# Supplementary material
Source: PubMed Central journal article supplement (PMC4357627)
Supplement: 13280_2014_554_MOESM1_ESM.pdf [file 13280_2014_554_MOESM1_ESM.pdf]

***AMBIO***

**Electronic Supplementary Material**

The role the Great Barrier Reef plays in resident wellbeing and implications for management

**Silva Larson, Natalie Stoeckl, Marina Farr, Michelle Esparon**

This supplementary material has not been peer reviewed

**Supplementary Table S1. Characteristics of respondents (n=1546)**

| <b>Characteristic</b>                 | <b>Percentage respondents</b> |
|---------------------------------------|-------------------------------|
| Female                                | 50.3                          |
| Single                                | 22.6                          |
| Born in Australia                     | 80.6                          |
| Born in QLD                           | 51.3                          |
| Aborigine/Torres Strait Islander      | 6.6                           |
| Age:                                  |                               |
| Under 40                              | 27.8                          |
| 40-60 years old                       | 44.3                          |
| More than 60                          | 28.1                          |
| Household size:                       |                               |
| One person                            | 13.5                          |
| Two people                            | 44.2                          |
| Three people                          | 16.4                          |
| More than 3                           | 25.9                          |
| Education levels:                     |                               |
| Primary                               | 3.8                           |
| High school to year 10                | 20.2                          |
| High school to year 12                | 19.8                          |
| Trade                                 | 18.4                          |
| University                            | 31.0                          |
| Sector of employment:                 |                               |
| Retail, Accommodation, Cafes, Tourism | 12.7                          |
| Government, Health and Education      | 26.5                          |
| Agriculture                           | 22.4                          |
| Mining, Manufacturing and Ports       | 31.0                          |
| Fishing                               | 7.4                           |
| Annual household income:              |                               |
| Under 60,000 A\$                      | 21.7                          |
| 60-100,000 A\$                        | 30.4                          |
| Over 100,000 A\$                      | 39.0                          |
| NRM region:                           |                               |
| Torres Strait and Wet Tropics         | 26.9                          |
| Burdekin                              | 26.1                          |
| Mackay Whitsunday                     | 20.8                          |
| Fitzroy and south                     | 26.2                          |
| Recreational fisher(wo)men            | 46.6                          |

| Supplementary Table S2. SUR MODEL RESULTS: Importance               |                    |                    |                       |                     |                     |                       |                     |                      |                    |                     |                        |                     |                    |                     |                     |                     |                     |                     |
|---------------------------------------------------------------------|--------------------|--------------------|-----------------------|---------------------|---------------------|-----------------------|---------------------|----------------------|--------------------|---------------------|------------------------|---------------------|--------------------|---------------------|---------------------|---------------------|---------------------|---------------------|
| Variables                                                           | Tourism industry   | Comm Fishing       | Mining/ Agriculture   | Cheap shipping      | Future generation   | Seafood               | Fishing             | Times beach          | Boating            | Indigenous          | Bragging rights        | Underdev beaches    | No rubbish         | Coral reefs         | Iconic species      | Clear ocean         | Mangroves           | Reef fish           |
|                                                                     | coeff (se)         | coeff (se)         | coeff (se)            | coeff (se)          | coeff (se)          | coeff (se)            | coeff (se)          | coeff (se)           | coeff (se)         | coeff (se)          | coeff (se)             | coeff (se)          | coeff (se)         | coeff (se)          | coeff (se)          | coeff (se)          | coeff (se)          | coeff (se)          |
| Intercept                                                           | 0.93***<br>(0.291) |                    |                       | 0.89***<br>(0.303)  | 1.82***<br>(0.200)  | 0.96***<br>(0.089)    | 0.81***             | 1.12***<br>(0.231)   | 0.92***<br>(0.316) |                     | 0.76**<br>(0.344)      | 0.95***<br>(0.235)  | 1.93***<br>(0.146) | 1.85***<br>(0.155)  | 1.93***<br>(0.172)  | 1.79***<br>(0.170)  | 1.75***<br>(0.165)  | 1.65***<br>(0.144)  |
| Male                                                                |                    |                    |                       |                     | -0.21***<br>(0.055) | -0.11*<br>(0.062)     | 0.34***<br>(0.093)  | -0.14**<br>(0.063)   | 0.23***<br>(0.087) | -0.37***<br>(0.083) | -0.21**<br>(0.094)     | -0.21***<br>(0.064) | -0.09**<br>(0.040) | -0.14***<br>(0.042) | -0.15***<br>(0.047) | -0.18***<br>(0.046) | -0.13***<br>(0.045) | -0.13***<br>(0.039) |
| Single                                                              |                    | -0.21**<br>(0.106) | -0.21*<br>(0.110)     |                     |                     |                       | 0.21*<br>(0.121)    |                      |                    | 0.37***<br>(0.109)  | 0.36***<br>(0.123)     |                     |                    |                     |                     |                     |                     |                     |
| Age                                                                 |                    |                    |                       |                     | -0.004**<br>(0.002) | 0.01***<br>(0.002)    |                     |                      | -0.01*<br>(0.003)  |                     | -0.01**<br>(0.003)     |                     |                    | -0.003*<br>(0.001)  | -0.01***<br>(0.001) | -0.004**<br>(0.001) |                     |                     |
| Born QLD                                                            |                    |                    | 0.17**<br>(0.085)     |                     |                     |                       | 0.22**<br>(0.094)   |                      |                    | -0.26***<br>(0.085) |                        |                     | -0.08*<br>(0.040)  |                     |                     | -0.09*<br>(0.047)   |                     |                     |
| Indigenous                                                          |                    |                    | -0.49**<br>(0.188)    |                     |                     |                       |                     |                      |                    | 0.75***<br>(0.186)  |                        |                     |                    | 0.15*<br>(0.095)    |                     | 0.17*<br>(0.104)    | 0.21**<br>(0.101)   | 0.17**<br>(0.088)   |
| Education                                                           |                    |                    | -0.09**<br>(0.037)    | -0.11***<br>(0.036) |                     |                       | -0.19***<br>(0.040) |                      | -0.07*<br>(0.038)  | 0.08**<br>(0.036)   |                        |                     |                    |                     |                     |                     |                     | 0.03*<br>(0.017)    |
| Household Income                                                    |                    |                    | 0.000002**<br>(0.000) |                     |                     | 0.000002**<br>(0.000) |                     | 0.000001*<br>(0.000) |                    |                     | -0.000002**<br>(0.000) |                     |                    |                     |                     |                     |                     |                     |
| Household size                                                      |                    |                    |                       |                     |                     |                       |                     |                      |                    |                     |                        | 0.07***<br>(0.025)  |                    |                     |                     |                     |                     |                     |
| Fishing inc main source                                             | 1.05***<br>(0.156) |                    |                       |                     |                     |                       | 0.30*<br>(0.094)    | 0.278**<br>(0.124)   | 0.56***<br>(0.169) | 0.31*<br>(0.163)    |                        | 0.21*<br>(0.126)    |                    |                     |                     | 0.15*<br>(0.091)    |                     |                     |
| Mining, Manufacturing & Ports inc main source                       |                    |                    | 0.61***<br>(0.109)    |                     |                     | 0.13*<br>(0.081)      | 0.32***<br>(0.121)  | 0.137*<br>(0.082)    | 0.31***<br>(0.113) |                     |                        |                     |                    |                     |                     |                     |                     |                     |
| Agriculture & Forestry inc main source                              |                    |                    |                       |                     |                     |                       |                     |                      |                    |                     |                        |                     |                    |                     |                     |                     |                     |                     |
| Retail; Accommod, cafes & restaurants; & Tourism income main source |                    |                    |                       | 0.28**<br>(0.131)   |                     |                       |                     | 0.196**<br>(0.231)   |                    |                     | 0.338**<br>(0.344)     |                     |                    |                     |                     |                     |                     |                     |
| N                                                                   | 830                | 830                | 830                   | 830                 | 830                 | 830                   | 830                 | 830                  | 830                | 830                 | 830                    | 830                 | 830                | 830                 | 830                 | 830                 | 830                 | 830                 |
| Breusch-Pagan test of independence: chi2                            | 18276.8***         |                    |                       |                     |                     |                       |                     |                      |                    |                     |                        |                     |                    |                     |                     |                     |                     |                     |
| AIC                                                                 | 30624.05           |                    |                       |                     |                     |                       |                     |                      |                    |                     |                        |                     |                    |                     |                     |                     |                     |                     |
| BIC                                                                 | 31728.8            |                    |                       |                     |                     |                       |                     |                      |                    |                     |                        |                     |                    |                     |                     |                     |                     |                     |

\* significant at 10% level  
\*\* significant at 5% level  
\*\*\* significant at 1% level

| Supplementary Table S3. SUR MODEL RESULTS: Satisfaction (system of 18 equations) |                   |              |                      |                   |                    |            |                  |                    |                    |                   |                    |                    |                    |                    |                    |                   |                    |                    |
|----------------------------------------------------------------------------------|-------------------|--------------|----------------------|-------------------|--------------------|------------|------------------|--------------------|--------------------|-------------------|--------------------|--------------------|--------------------|--------------------|--------------------|-------------------|--------------------|--------------------|
| Variables                                                                        | Tourism industry  | Comm Fishing | Mining/ Agriculture  | Cheap shipping    | Future generation  | Seafood    | Fishing          | Times beach        | Boating            | Indigenous        | Bragging rights    | Underdev beaches   | No rubbish         | Coral reefs        | Iconic species     | Clear ocean       | Mangroves          | Reef fish          |
|                                                                                  | coeff (se)        | coeff (se)   | coeff (se)           | coeff (se)        | coeff (se)         | coeff (se) | coeff (se)       | coeff (se)         | coeff (se)         | coeff (se)        | coeff (se)         | coeff (se)         | coeff (se)         | coeff (se)         | coeff (se)         | coeff (se)        | coeff (se)         | coeff (se)         |
| Intercept                                                                        |                   |              |                      |                   |                    |            |                  | 0.81***<br>(0.303) |                    |                   | 0.55*<br>(0.297)   |                    |                    |                    |                    |                   |                    | 0.94***<br>(0.354) |
| Male                                                                             |                   |              |                      |                   |                    |            |                  | -0.21**<br>(0.083) |                    |                   |                    |                    |                    |                    |                    |                   |                    |                    |
| Single                                                                           |                   |              |                      |                   |                    |            |                  | 0.21**<br>(0.103)  | 0.27**<br>(0.107)  | 0.23**<br>(0.108) |                    |                    |                    |                    |                    |                   |                    |                    |
| Age                                                                              |                   |              |                      |                   | 0.01*<br>(0.004)   |            |                  |                    |                    |                   |                    |                    |                    |                    |                    |                   |                    |                    |
| Born QLD                                                                         |                   |              |                      |                   |                    |            | 0.18*<br>(0.095) |                    |                    |                   |                    |                    |                    |                    |                    |                   |                    |                    |
| Indigenous                                                                       |                   |              |                      |                   |                    |            |                  |                    |                    |                   |                    | -0.37**<br>(0.187) |                    |                    | -0.36*<br>(0.211)  |                   |                    |                    |
| Education                                                                        |                   |              |                      |                   | -0.12**<br>(0.050) |            |                  |                    |                    |                   |                    |                    |                    | -0.09**<br>(0.045) | -0.10**<br>(0.046) |                   | -0.11**<br>(0.044) | -0.08*<br>(0.043)  |
| Household Income                                                                 |                   |              | 0.000002*<br>(0.000) |                   |                    |            |                  |                    |                    |                   |                    |                    |                    |                    |                    |                   |                    |                    |
| Household size                                                                   |                   |              |                      |                   |                    |            |                  |                    | 0.08**<br>(0.035)  |                   |                    |                    |                    |                    | 0.07*<br>(0.042)   |                   |                    | 0.08*<br>(0.040)   |
| Fishing inc main source                                                          | 0.37**<br>(0.148) |              |                      |                   |                    |            |                  |                    | 0.52***<br>(0.159) |                   | 0.46***<br>(0.151) | 0.29*<br>(0.166)   | 0.57***<br>(0.193) | 0.35*<br>(0.183)   | 0.52***<br>(0.187) | 0.42**<br>(0.173) | 0.46***<br>(0.179) | 0.38**<br>(0.179)  |
| Mining, Manufacturing & Ports inc main source                                    |                   |              | 0.42***<br>(0.127)   |                   |                    |            |                  |                    | 0.24**<br>(0.116)  |                   |                    |                    |                    |                    |                    | 0.27**<br>(0.126) | 0.22*<br>(0.130)   |                    |
| Agriculture & Forestry income main source                                        |                   |              |                      |                   |                    |            |                  |                    |                    |                   |                    |                    |                    |                    |                    |                   |                    |                    |
| Retail, Accom, cafes & restaurants; & Tourism inc main source                    |                   |              | 0.32**<br>(0.138)    | 0.25**<br>(0.289) |                    |            |                  |                    |                    |                   |                    |                    |                    |                    |                    |                   |                    |                    |
| N                                                                                | 471               | 471          | 471                  | 471               | 471                | 471        | 471              | 471                | 471                | 471               | 471                | 471                | 471                | 471                | 471                | 471               | 471                | 471                |
| Breusch-Pagan test of independence: chi2                                         | 12084.8***        |              |                      |                   |                    |            |                  |                    |                    |                   |                    |                    |                    |                    |                    |                   |                    |                    |
| AIC                                                                              | 18708.8           |              |                      |                   |                    |            |                  |                    |                    |                   |                    |                    |                    |                    |                    |                   |                    |                    |
| BIC                                                                              | 19681.1           |              |                      |                   |                    |            |                  |                    |                    |                   |                    |                    |                    |                    |                    |                   |                    |                    |

\* significant at 10% level  
\*\* significant at 5% level  
\*\*\* significant at 1% level
